# Supplementary material for: Evaluation of Thermal Changes of the Sole Surface in Horses with Palmar Foot Pain: A Pilot Study
Source: MDPI journal article supplement (doi:10.3390/biology12030423), 2023-03-10
Supplement: s1 [file s1]

### Thermography results – Temperature for toe area EI2

**Table S1:** Study group horses with palmar foot pain: Temperature of the toe area (EI2)

| Specimen | Minimum temperature<br>before/after training,<br>°C | Mean temperature<br>before/after training, °C |
|----------|-----------------------------------------------------|-----------------------------------------------|
| 1        | 20.5 / 27.4                                         | 22.8 / 31.7                                   |
| 2        | 19.5 / 28.9                                         | 23.0 / 31.4                                   |
| 3        | 21.1 / 28.8                                         | 24.4 / 29.8                                   |
| 4        | 21.4 / 28.6                                         | 25.2 / 29.3                                   |
| 5        | 20.3 / 28.9                                         | 24.6 / 31.1                                   |
| 6        | 20.2 / 27.9                                         | 23.7 / 29.1                                   |
| 7        | 21.1 / 27.5                                         | 23.7 / 29.5                                   |
| 8        | 20.7 / 24.2                                         | 24.1 / 28.7                                   |

**Table S2:** Study group non-lame limb: Temperatures of the toe area (EI2)

| Specimen | Minimum temperature<br>before/after training,<br>°C | Mean temperature<br>before/after training, °C |
|----------|-----------------------------------------------------|-----------------------------------------------|
| 1        | 27.8 / 29.3                                         | 27.3 / 29.9                                   |
| 2        | 26.9 / 28.2                                         | 28.3 / 29.6                                   |
| 3        | 27.8 / 29.1                                         | 28.4 / 30.0                                   |
| 4        | 28.5 / 29.0                                         | 29.3 / 30.1                                   |
| 5        | 27.3 / 28.6                                         | 28.3 / 29.4                                   |
| 6        | 28.2 / 29.6                                         | 28.4 / 29.7                                   |
| 7        | 27.5 / 28.3                                         | 28.2 / 28.9                                   |
| 8        | 27.6 / 29.0                                         | 29.3 / 30.2                                   |

**Table S3:** Control group: Temperatures of the toe area (EI2)

| Specimen | Minimum temperature<br>before/after training,<br>°C | Mean temperature<br>before/after training, °C |
|----------|-----------------------------------------------------|-----------------------------------------------|
| 1        | 24.7 / 26.1                                         | 26.7 / 27.5                                   |
| 2        | 23.9 / 25.1                                         | 26.3 / 28.0                                   |
| 3        | 22.5 / 25.7                                         | 25.6 / 27.2                                   |
| 4        | 25.1 / 27.4                                         | 27.2 / 27.9                                   |

## Thermography results – Temperature for frog area EI1

**Table S4:** Study group horses with palmar foot pain: temperature of the frog area (EI1)

| Specimen | Minimum temperature<br>before/after training,<br>°C | Mean temperature<br>before/after training, °C |
|----------|-----------------------------------------------------|-----------------------------------------------|
| 1        | 19.8 / 21.1                                         | 20.9 / 23.8                                   |
| 2        | 21.2 / 22.1                                         | 22.6 / 24.1                                   |
| 3        | 20.8 / 21.5                                         | 22.2 / 23.5                                   |
| 4        | 19.9 / 20.0                                         | 21.3 / 21.7                                   |
| 5        | 21.3 / 23.1                                         | 22.9 / 24.0                                   |
| 6        | 20.7 / 22.3                                         | 21.9 / 26.2                                   |
| 7        | 21.1 / 22.6                                         | 23.0 / 25.1                                   |
| 8        | 23.6 / 24.8                                         | 24.6 / 26.0                                   |

**Table S5:** Study group non-lame limb: Temperatures of the frog area (EI1)

| Specimen | Minimum temperature<br>before/after training,<br>°C | Mean temperature<br>before/after training, °C |
|----------|-----------------------------------------------------|-----------------------------------------------|
| 1        | 26.4 / 28.6                                         | 27.9 / 29.3                                   |
| 2        | 25.5 / 29.2                                         | 29.9 / 29.7                                   |
| 3        | 26.5 / 27.8                                         | 27.4 / 28.8                                   |
| 4        | 28.5 / 30.8                                         | 29.9 / 31.9                                   |
| 5        | 26.2 / 28.4                                         | 28.2 / 29.4                                   |
| 6        | 27.2 / 28.3                                         | 28.3 / 30.1                                   |
| 7        | 26.9 / 28.7                                         | 27.7 / 29.1                                   |
| 8        | 26.7 / 28.4                                         | 27.3 / 29.3                                   |

**Table S6:** Control group: Temperatures of the frog area (EI1)

| Specimen | Minimum temperature<br>before/after training,<br>°C | Mean temperature<br>before/after training, °C |
|----------|-----------------------------------------------------|-----------------------------------------------|
| 1        | 22.3 / 25.6                                         | 24.1 / 26.8                                   |
| 2        | 23.9 / 24.7                                         | 25.5 / 26.1                                   |
| 3        | 23.0 / 25.8                                         | 24.3 / 27.4                                   |
| 4        | 22.3 / 24.7                                         | 25.1 / 26.1                                   |
